# Supplementary material
Source: PubMed Central journal article supplement (PMC240747)

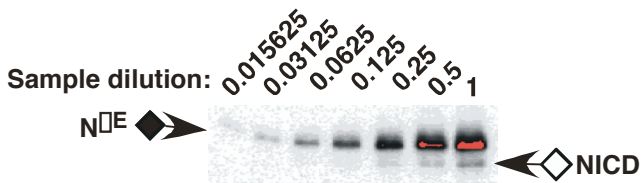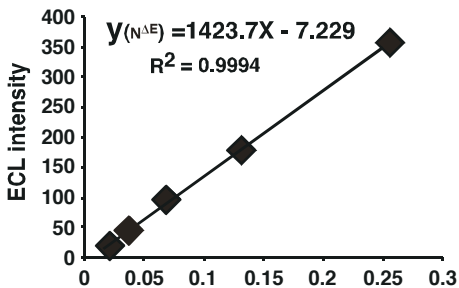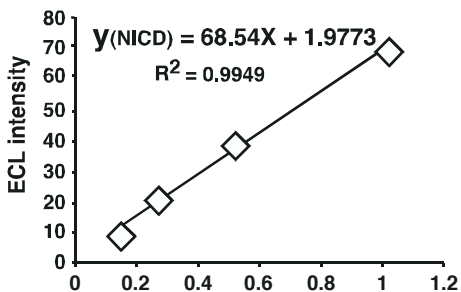

Supplement: pnas_100_22_13075__2.pdf [file pnas_100_22_13075__2.pdf]

### A. Dose response curve for Compound #11

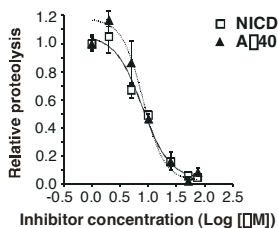

### B. IC50 correlation

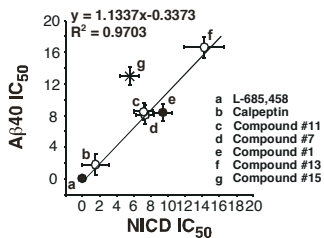

### C. Dose response curve for Compound #15

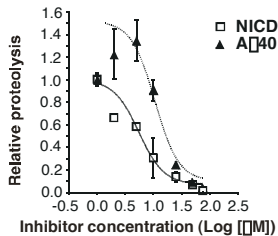

Supplement: pnas_100_22_13075__4.pdf [file pnas_100_22_13075__4.pdf]

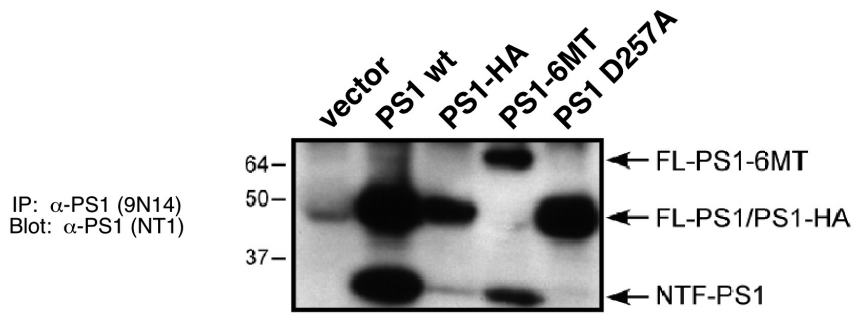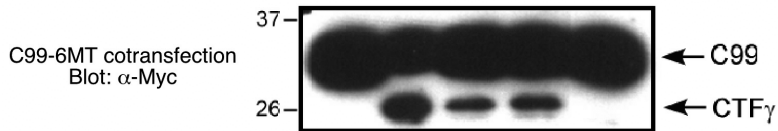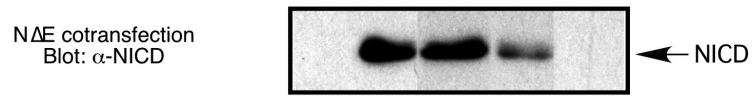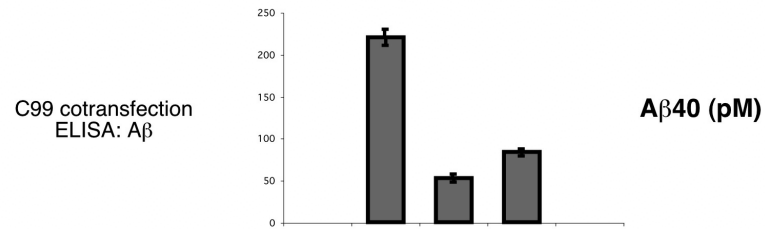

Supplement: pnas_100_22_13075__6.pdf [file pnas_100_22_13075__6.pdf]
